# Supplementary material for: Boron nanosheets boosting solar thermal water evaporation
Source: Royal Society of Chemistry journal article supplement (doi:10.1039/d3nr06146a), 2024-01-01
Supplement: d3nr06146a1.pdf [file d3nr06146a1.pdf]

## Supplementary Data

### Boron Nanosheets Boosting Solar Thermal Water Evaporation

Xin Stella Zhang, Shudi Mao, Jiashu Wang, Casey Onggowarsito, An Feng, Rui Han,  
Hanwen Liu, Guojin Zhang, Zhimei Xu, Limei Yang, Qiang Fu\* and Zhenguo Huang\*

*School of Civil and Environmental Engineering, University of Technology Sydney, Ultimo,  
New South Wales 2007, Australia*

12 **1. Supplementary figures and tables**

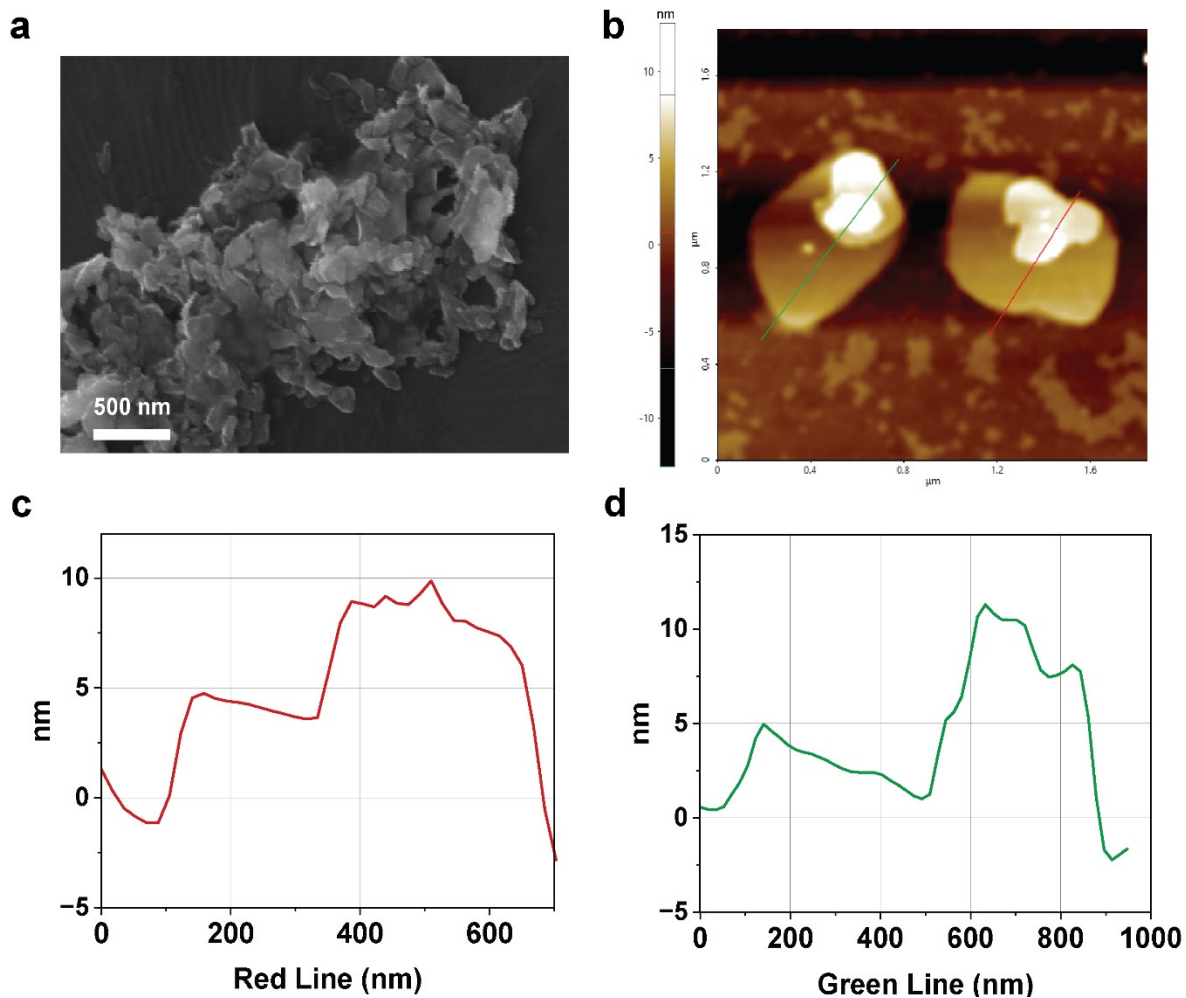

13

14 **Fig. S1.** (a) SEM image of CBNS, (b) AFM image of CBNS, (c-d) AFM analysis of CBNS  
15 showing the thickness of CBNS (green line and red line).

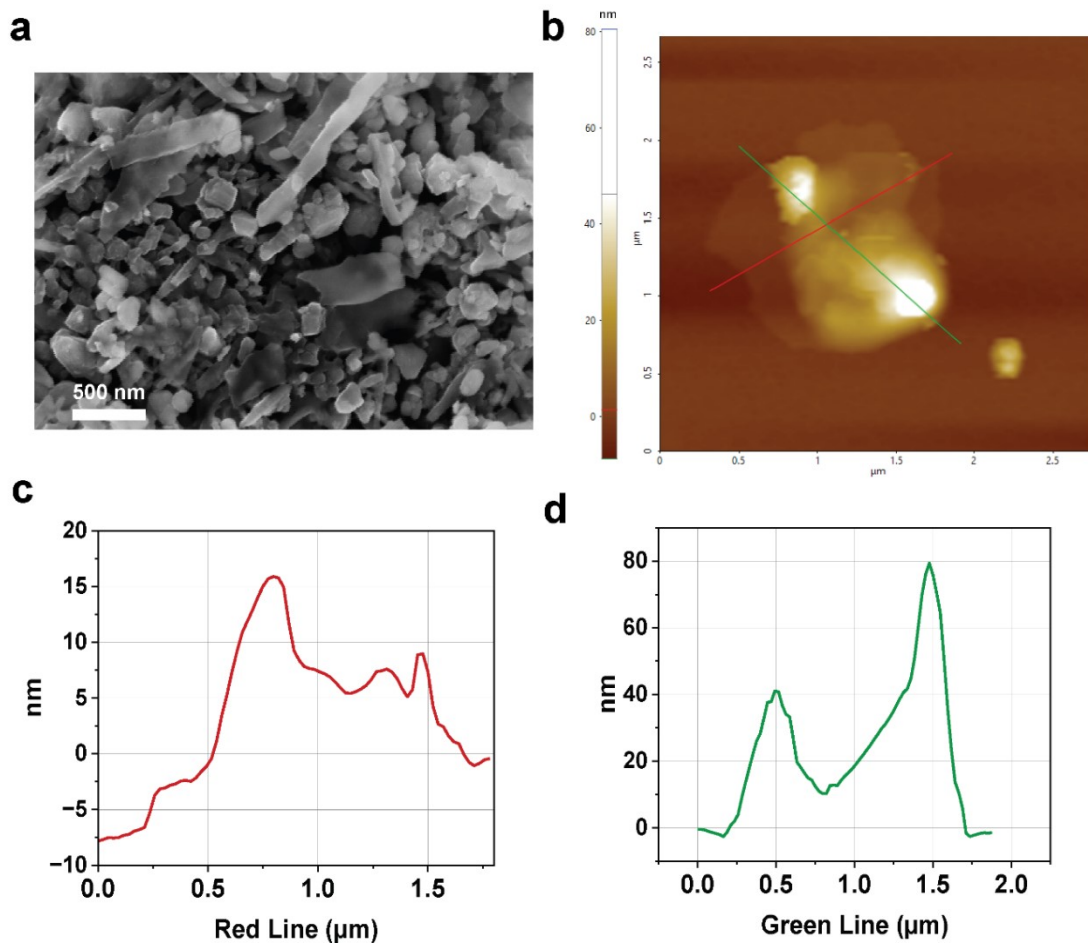

16

17 **Fig. S2.** (a) SEM image of ABNS, (b) AFM image of ABNS, (c-d) AFM analysis of ABNS  
 18 showing the thickness of ABNS (green line and red line).

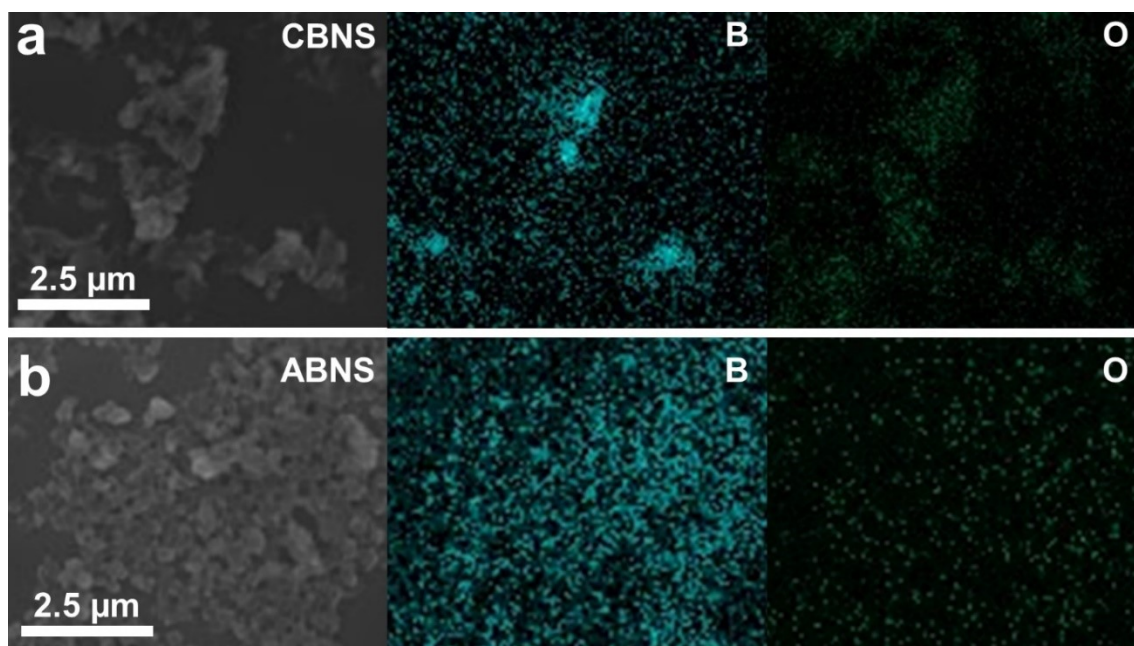

19

20

**Fig. S3.** Elemental mapping images of (a) CBNS and (b) ABNS.

21

22 X-ray photoelectron spectroscopy (XPS) data were calibrated using adventitious C1s peak at  
 23 a fixed value of 284.4 eV.

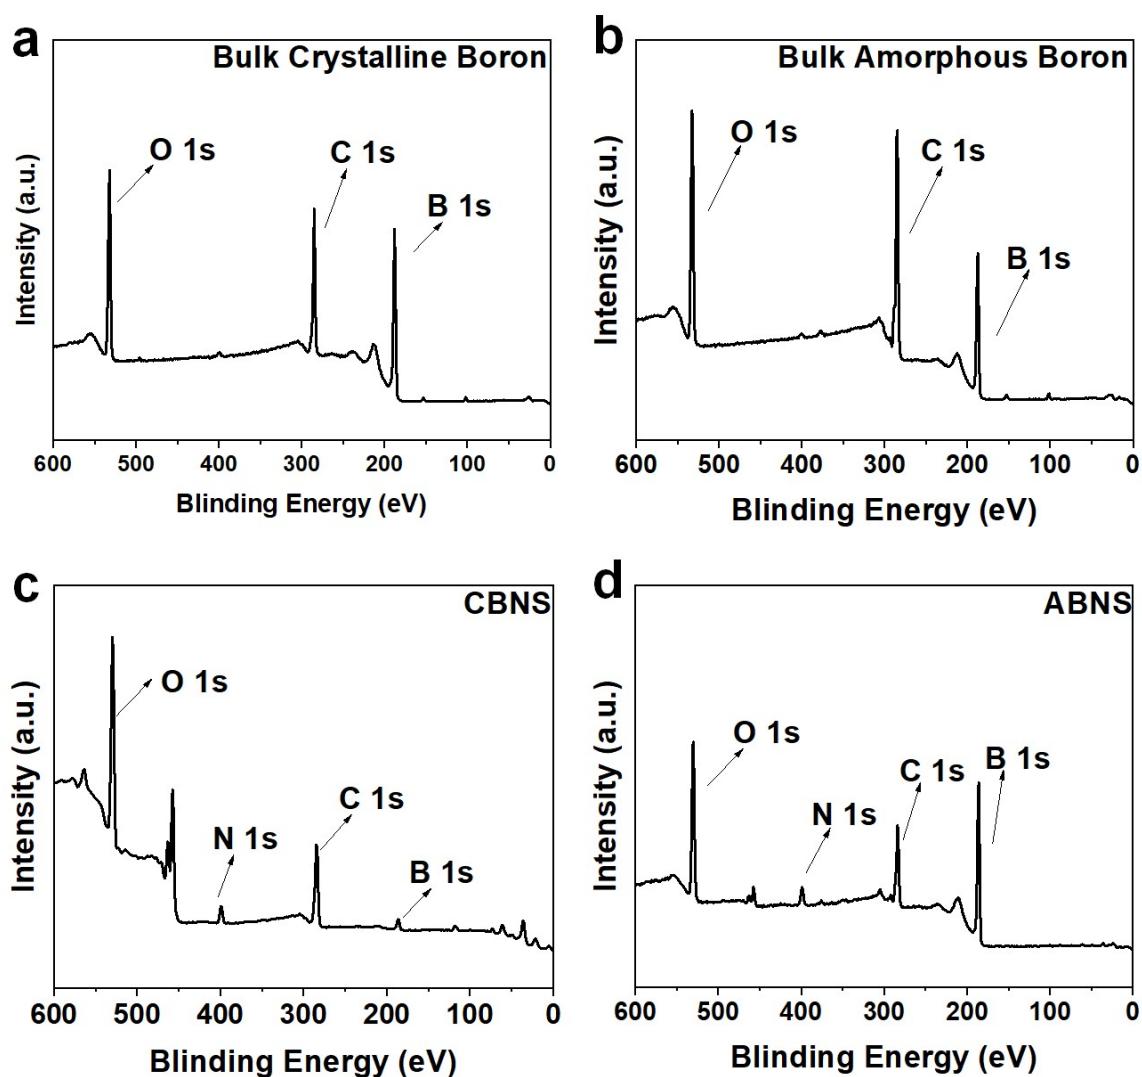

24

25 **Fig. S4.** Full-scale XPS survey spectra of (a) bulk crystalline boron, (b) bulk amorphous  
 26 boron, (c) CBNS and (d) ABNS.

27

28 **Table S1.** The percentage of B-B and B-O bonds based upon the XPS spectra.

| Samples                | Ratio of bond peak |        |
|------------------------|--------------------|--------|
|                        | B-B                | B-O    |
| ABNS                   | 82.26%             | 17.74% |
| Bulk Amorphous Boron   | 80.07%             | 19.93% |
| CBNS                   | 74.75%             | 25.25% |
| Bulk Crystalline Boron | 75.35%             | 24.65% |

29

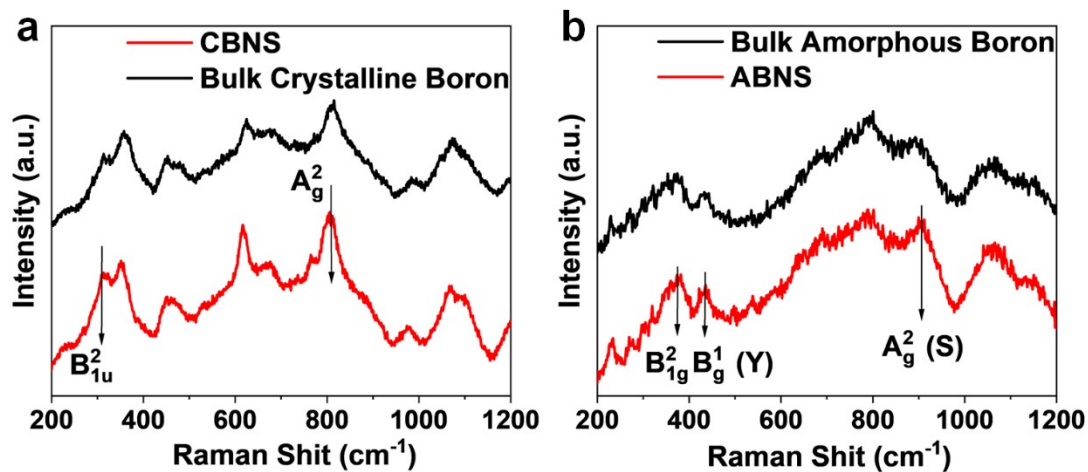

30

31 **Fig. S5.** Raman spectra of (a) CBNS and bulk crystalline boron, (b) ABNS and bulk  
32 amorphous Boron.

33

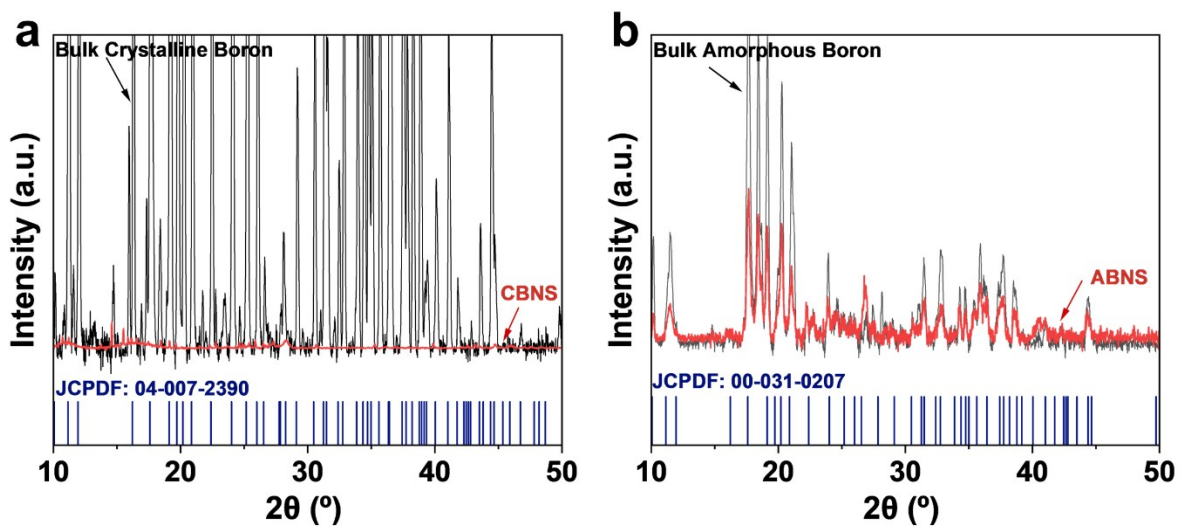

34

35 **Fig. S6.** XRD patterns of (a) bulk crystalline boron (JCPDF: 04-007-2390) and CBNS, (b)  
36 bulk amorphous boron (JCPDF: 00-031-0207-β-rhombohedral) and ABNS.

37

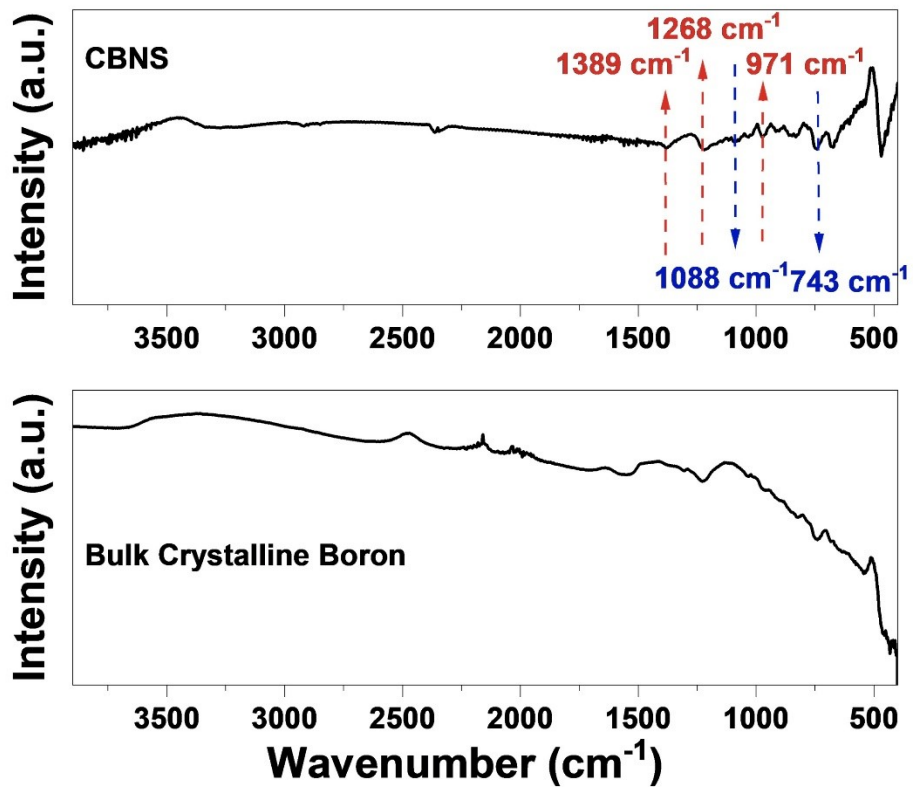

38

39

40

Fig. S7. FT-IR spectra of CBNS and bulk crystalline boron.

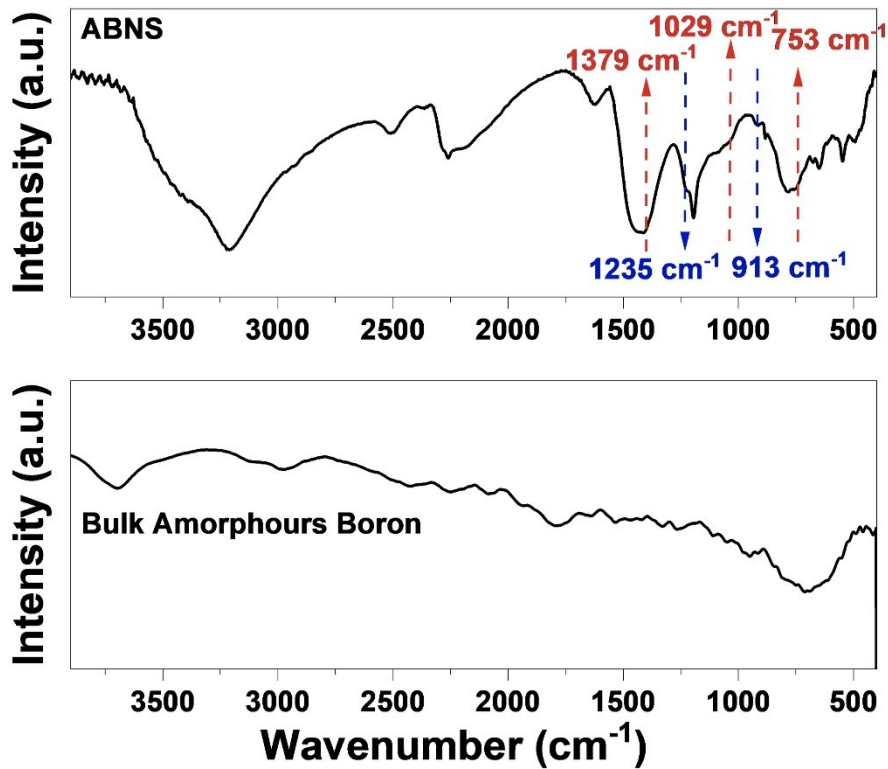

41

42

Fig. S8. FT-IR spectra of ABNS and bulk amorphous boron.

43

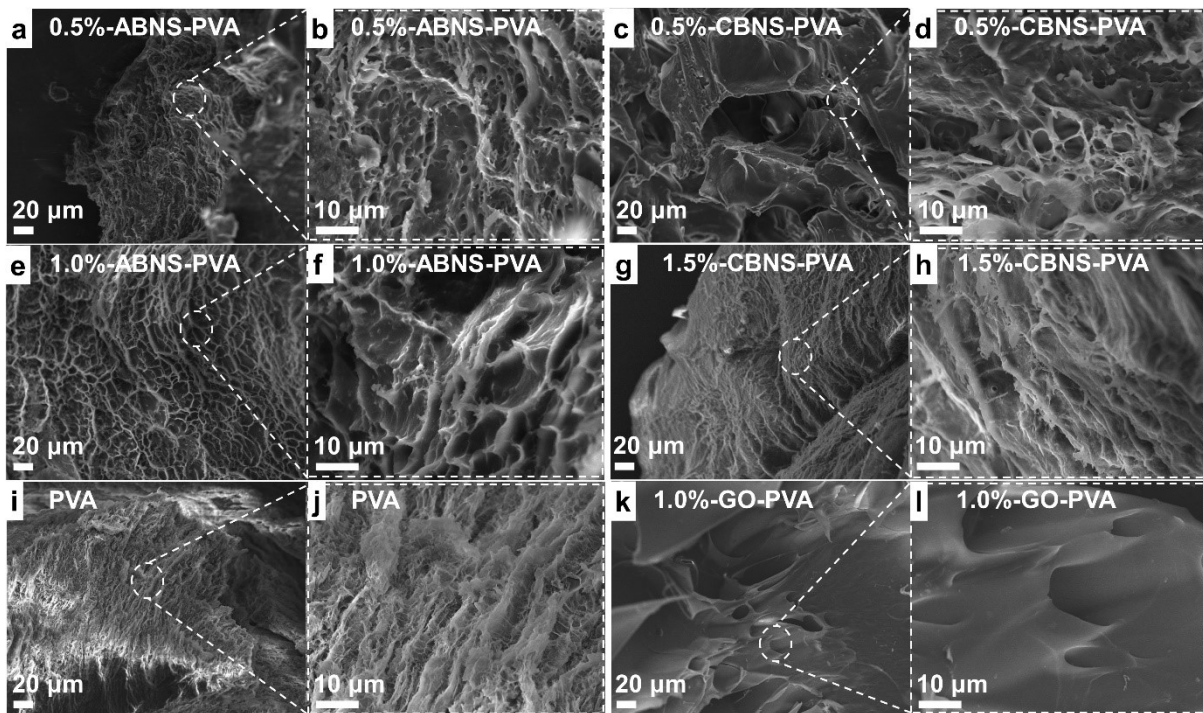

44

45 **Fig. S9.** SEM images of (a-b) 0.5%-ABNS-PVA, (c-d) 0.5%-CBNS-PVA, (e-f) 1.0%-ABNS-  
46 PVA, (g-h) 1.5%-CBNS-PVA PVA, (i-j) PVA, and (k-l) 1.0%-GO-PVA.

47

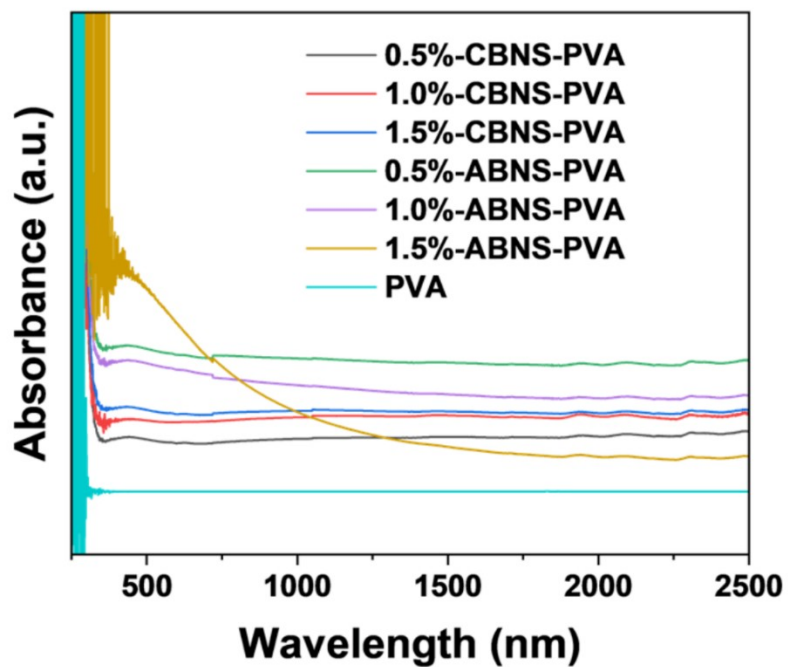

48

49

**Fig. S10.** UV-vis-NIR spectra of x-CBNS-PVA hydrogel and x-ABNS-PVA.

50

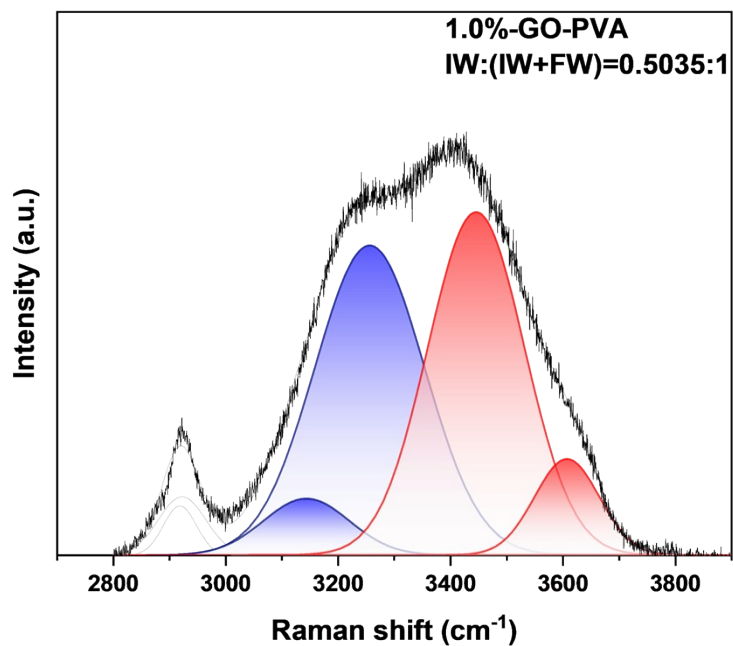

51

52

**Fig. S11.** Raman spectrum of 1.0%-GO-PVA shows the intermediate water content.

53

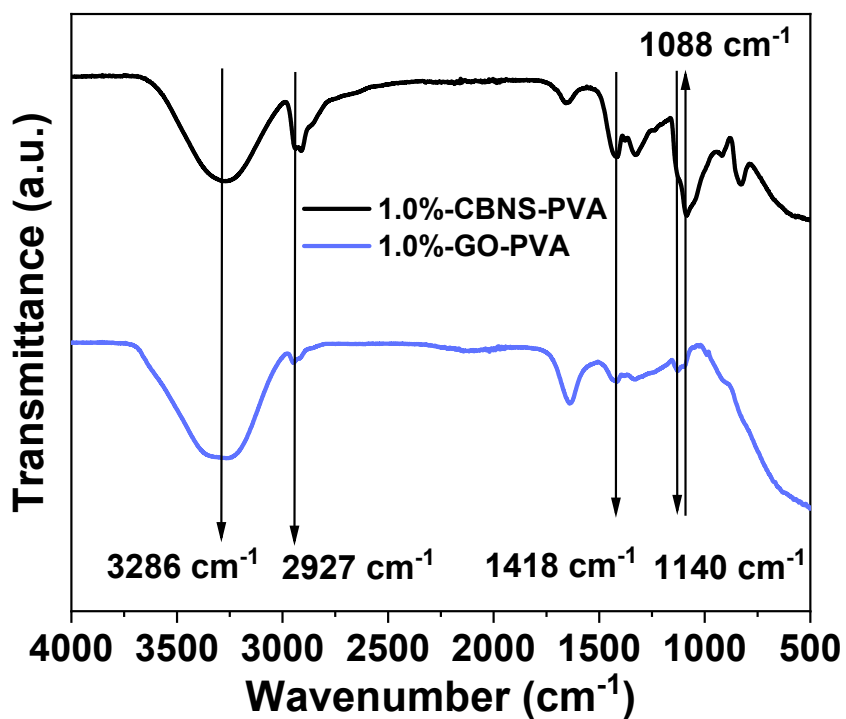

54

55

**Fig. S12.** FTIR spectra of 1.0%-CBNS-PVA (black line) and 1.0%-GO-PVA (blue line).



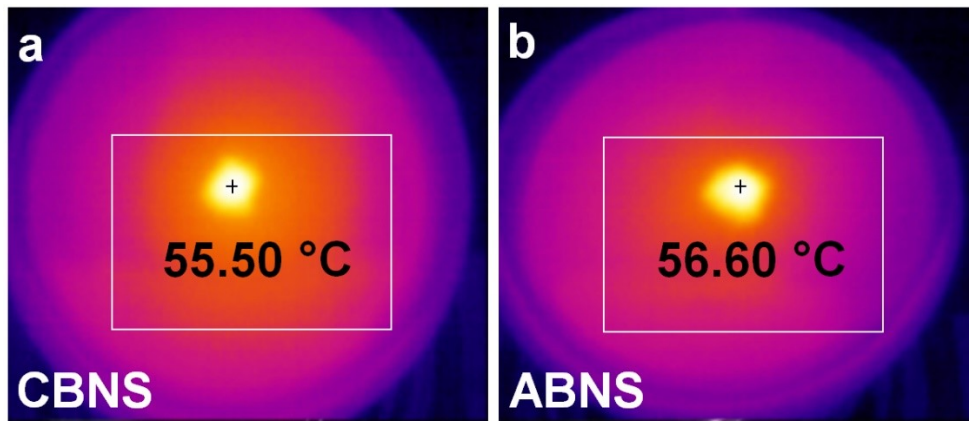

56

57 **Fig. S13.** Thermal infrared images of (a) CBNS and (b) ABNS powders under 1 sun after 60  
 58 mins

59

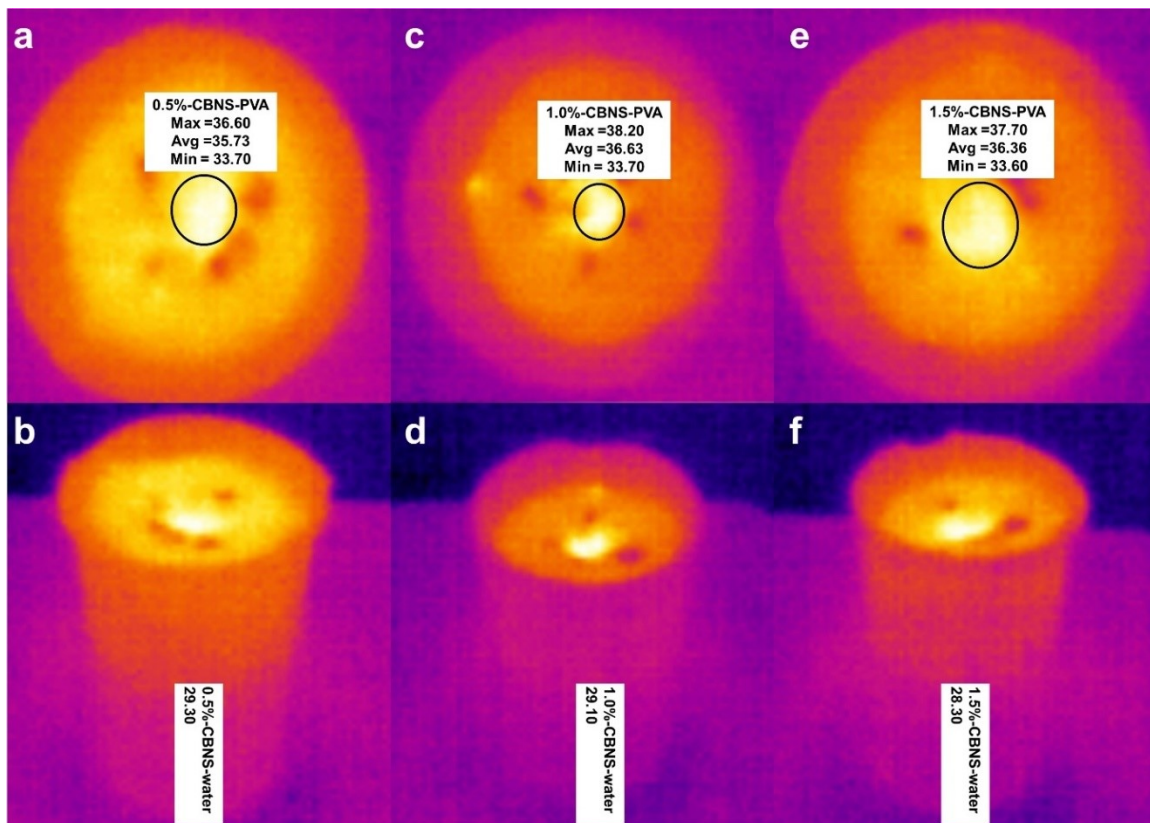

60

61 **Fig. S14.** Thermal infrared images of x-CBNS-PVA after 60 mins of SVG testing.

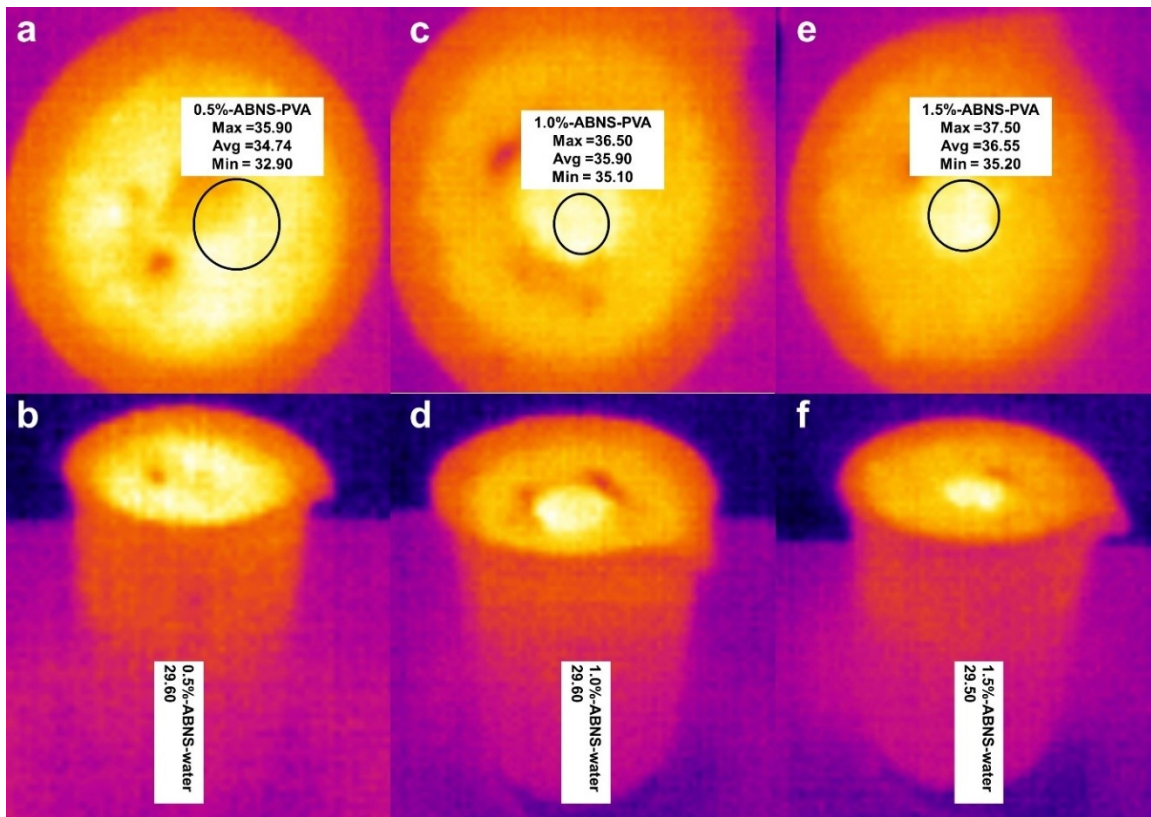

62

63

64

**Fig. S15.** Thermal infrared images of x-ABNS-PVA after 60 mins of SVG testing

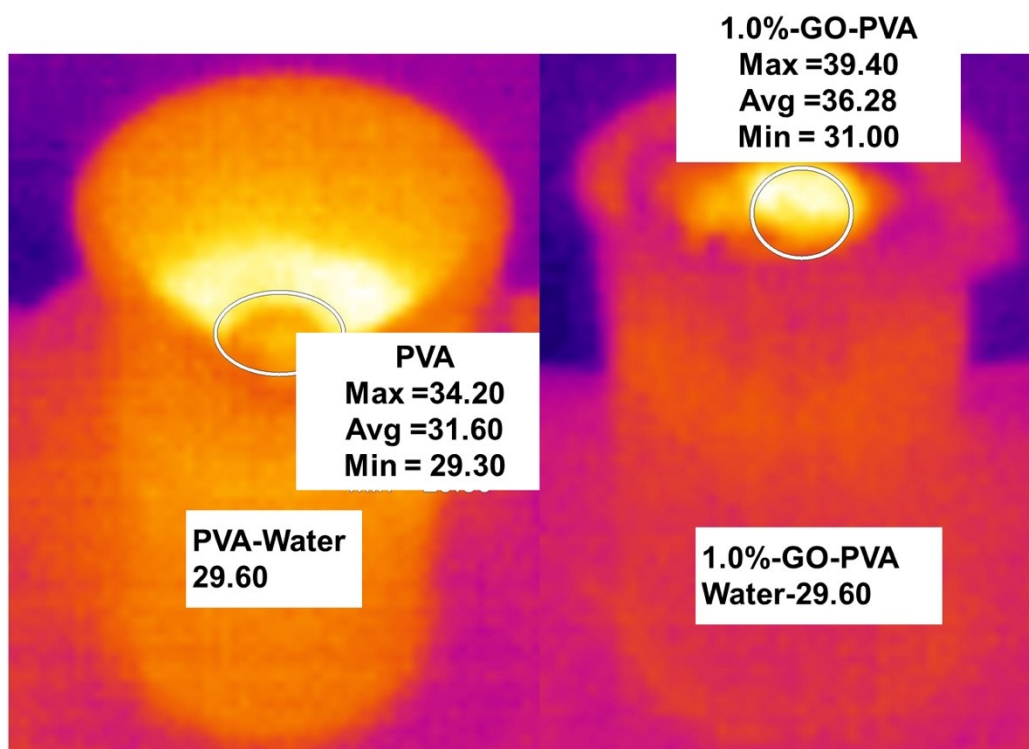

65

66

67

**Fig. S16.** Thermal infrared images of the pristine PVA and 1.0%-GO-PVA after 60 mins of SVG testing.

68 **Table S2.** The temperatures based on thermal infrared images of hydrogels at every 10 mins.

| Hydrogels              | Temperature (°C) |         |         |         |         |         |         |
|------------------------|------------------|---------|---------|---------|---------|---------|---------|
|                        | 0 mins           | 10 mins | 20 mins | 30 mins | 40 mins | 50 mins | 60 mins |
| <b>0.5%-CBNS</b>       | 23.10            | 35.40   | 36.00   | 36.10   | 36.40   | 36.10   | 36.60   |
| <b>Water-0.5%-CBNS</b> | 24.20            | 26.60   | 27.40   | 28.30   | 28.80   | 29.00   | 29.30   |
| <b>1.0%-CBNS</b>       | 20.30            | 34.80   | 37.10   | 36.00   | 37.10   | 37.40   | 38.20   |
| <b>Water-1.0%-CBNS</b> | 23.60            | 24.10   | 26.10   | 26.20   | 27.50   | 28.70   | 29.10   |
| <b>1.5%-CBNS</b>       | 20.20            | 33.90   | 35.80   | 35.70   | 36.20   | 36.80   | 37.70   |
| <b>Water-1.5%-CBNS</b> | 20.10            | 23.70   | 26.10   | 26.40   | 27.10   | 28.50   | 28.30   |
| <b>0.5%-ABNS</b>       | 19.10            | 31.00   | 32.20   | 34.90   | 35.10   | 35.90   | 35.90   |
| <b>Water-0.5%-ABNS</b> | 21.90            | 23.60   | 26.70   | 27.60   | 28.10   | 29.60   | 29.60   |
| <b>1.0%-ABNS</b>       | 22.80            | 33.60   | 34.10   | 35.00   | 35.90   | 36.40   | 36.50   |
| <b>Water-1.0%-ABNS</b> | 23.00            | 24.20   | 26.40   | 26.90   | 28.60   | 29.70   | 29.60   |
| <b>1.5%-ABNS</b>       | 21.80            | 35.30   | 35.10   | 36.60   | 37.10   | 37.20   | 37.50   |
| <b>Water-1.5%-ABNS</b> | 22.40            | 24.10   | 25.60   | 27.00   | 28.40   | 28.60   | 29.50   |
| <b>PVA</b>             | 21.00            | 32.30   | 32.50   | 34.60   | 33.70   | 34.00   | 34.20   |
| <b>Water-PVA</b>       | 24.90            | 26.80   | 29.20   | 29.60   | 30.40   | 30.40   | 30.10   |

69

70

71

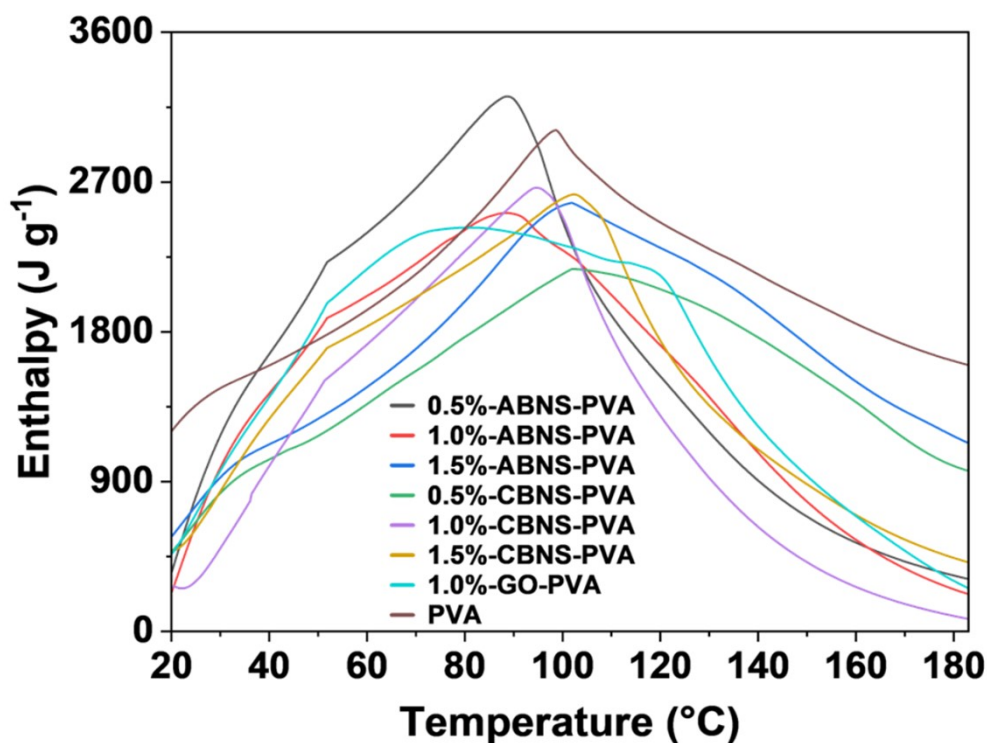

72

73 **Fig. S17.** The calculated equivalent water evaporation enthalpy at various temperatures using  
74 DSC data.

75

76 **Table S3.** An estimate of the equivalent water vaporisation enthalpy at the surface  
77 equilibrium temperature for the hydrogels.

| Hydrogels     | Equilibrium temperature | Equivalent evaporation enthalpy |
|---------------|-------------------------|---------------------------------|
|               | °C                      | J g <sup>-1</sup>               |
| 0.5%-CBNS-PVA | 35.73                   | 951.87                          |
| 1.0%-CBNS-PVA | 36.60                   | 845.11                          |
| 1.5%-CBNS-PVA | 36.30                   | 1148.96                         |
| 0.5%-ABNS-PVA | 34.60                   | 1438.60                         |
| 1.0%-ABNS-PVA | 35.90                   | 1276.44                         |
| 1.5%-ABNS-PVA | 36.55                   | 1071.47                         |
| 1.0%-GO-PVA   | 36.28                   | 1253.06                         |
| PVA           | 31.60                   | 1483.95                         |

78

79

80

81  
82

**Table S4.** The comparison of evaporation rate, equivalent evaporation enthalpy and efficiency of all the hydrogels.

| Hydrogels             | Evaporation rate                   | Equivalent evaporation enthalpy | Efficiency |
|-----------------------|------------------------------------|---------------------------------|------------|
|                       | kg m <sup>-2</sup> h <sup>-1</sup> | J g <sup>-1</sup>               | %          |
| <b>0.5%-CBNS-PVA</b>  | 3.28                               | 951.87                          | 86.73      |
| <b>1.0%-CBNS-PVA</b>  | 4.03                               | 845.11                          | 94.61      |
| <b>1.5%-CBNS-PVA</b>  | 3.17                               | 1148.96                         | 101.17     |
| <b>0.5%-ABNS-PVA</b>  | 2.71                               | 1438.60                         | 108.29     |
| <b>1.0%-ABNS -PVA</b> | 3.02                               | 1276.44                         | 107.08     |
| <b>1.5%-ABNS-PVA</b>  | 3.19                               | 1071.47                         | 94.94      |
| <b>1.0%-GO-PVA</b>    | 3.08                               | 1253.06                         | 107.21     |
| <b>PVA</b>            | 1.31                               | 1483.95                         | 54.00      |

83

84

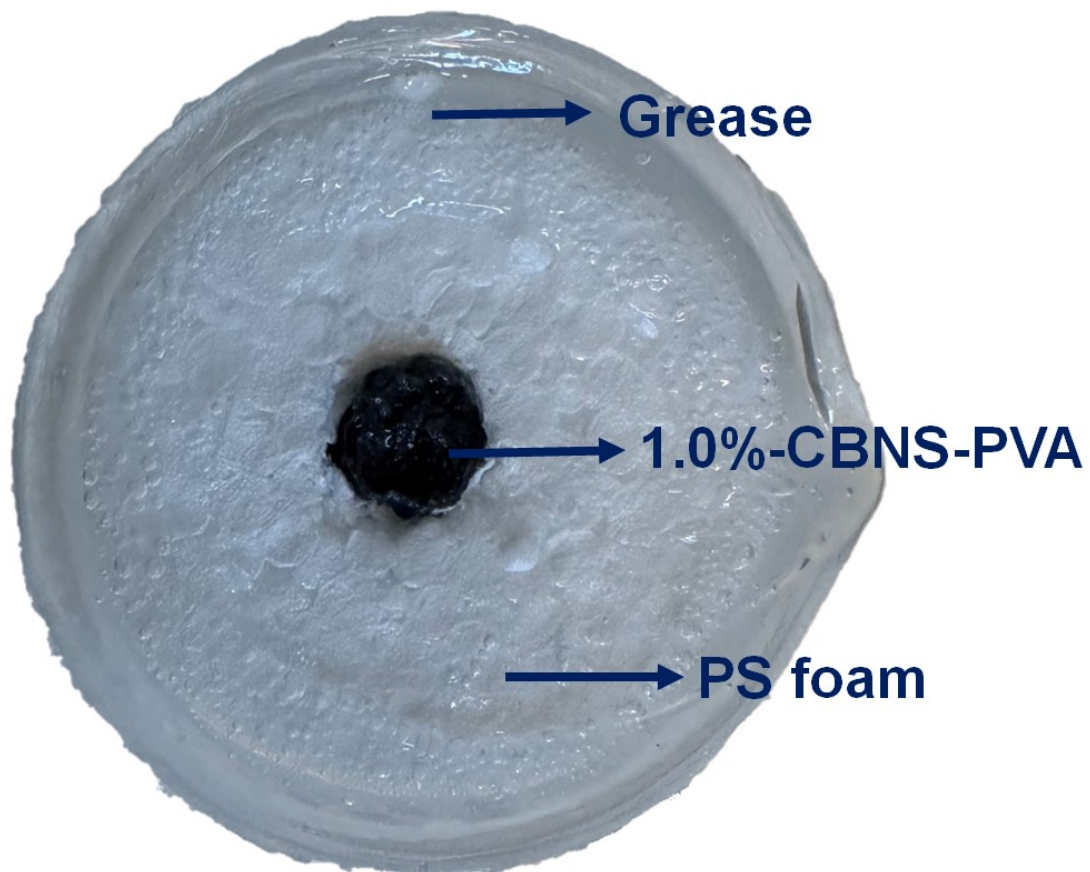

85

86 **Fig. S18.** The digital image of the 1.0%-CBNS-PVA surface after desalination for 14 days.

87

Table S6. The comparison among various functional sheets-based hydrogels.

| Reference | Materials                           |                                                                                                                                      | Evaporation rate                   | Energy conversion efficiency |
|-----------|-------------------------------------|--------------------------------------------------------------------------------------------------------------------------------------|------------------------------------|------------------------------|
|           | Polymer                             | Others                                                                                                                               | kg m <sup>-2</sup> h <sup>-1</sup> | %                            |
| 1         | PVA                                 | Nanoscale Surface Topography                                                                                                         | 2.6                                | 91                           |
| 2         | PVA                                 | Ti <sub>3</sub> C <sub>2</sub> T <sub>x</sub> MXene/r-GO                                                                             | 3.62                               | 91                           |
| 3         | PVA                                 | Konjac glucomannan (KGM), iron-based metal-organic framework (Fe-MOF)                                                                | 3.2                                | 90                           |
| 4         | PVA                                 | trichloro(octadecyl)silane (OTS) patchy-surface hydrogel                                                                             | 4                                  | 93                           |
| 5         | PVA                                 | Conducting polymer hollow spheres (CPHSs), superhydrophobic silica aerogel microparticles (SAMs)                                     | 1.83                               | 82.2                         |
| 6         | PVA, polyacrylamide (PAM)           | SA powder; Squid ink nanoparticles                                                                                                   | 2.3                                | 71.38                        |
| 7         | PVA                                 | Carboxylated multi-walled carbon nanotube (MWCNTs-COOH), hydrophobic PDMS as the top layer                                           | 1.34                               | 85.71                        |
| 8         | PVA                                 | Polypyrrole (PPy) and FeCl <sub>3</sub> .6H <sub>2</sub> O, 1H,1H,2H,2H-perfluoro octyl trichlorosilane (PFOTS) on the upper surface | 1.68                               | 94.7                         |
| 9         | PVA                                 | Powdered activated carbon, glucose and yeast                                                                                         | 1.611                              | 95.15                        |
| 10        | PVA                                 | A tree-inspired SSG system with Mxene (Ti <sub>3</sub> C <sub>2</sub> T <sub>x</sub> )                                               | 2.71                               | 90.7                         |
| 11        | PVA                                 | Consists of internal gaps, micron channels and molecular meshes, polypyrrole (PPy)                                                   | 3.2                                | 94                           |
| 12        | PVA                                 | r-GO, capillarity facilitated Water Transport                                                                                        | 2.5                                | 95                           |
| 13        | PVA and chitosan                    | Polypyrrole (PPy)                                                                                                                    | 3.6                                | 92                           |
| 14        | PVA and polystyrene sulfonate (PSS) | Activated carbon                                                                                                                     | 3.86                               | 92                           |
| 15        | polydimethylsiloxane (PDMS)         | plasmonic Cu <sub>7</sub> S <sub>4</sub> -MoS <sub>2</sub> -Au nanoparticles (CMA NPs)                                               | 3.824                              | 96.6                         |
| 16        | PVA                                 | titanium sesquioxide (Ti <sub>2</sub> O <sub>3</sub> )                                                                               | 3.6                                | 90                           |

|    |                                      |                                                                                                                      |       |       |
|----|--------------------------------------|----------------------------------------------------------------------------------------------------------------------|-------|-------|
| 17 | PVA                                  | molybdenum carbide (MoCx)                                                                                            | 1.59  | 83.6  |
| 18 | PVA                                  | Graphene/graphene oxide composite nanosheet                                                                          | 1.44  | 86    |
| 19 | PVA                                  | Graphene and N-Methyl pyrrolidone                                                                                    | 1.77  | 92    |
| 20 | PVA                                  | hydrogel-based ultrathin membrane (HUM)                                                                              | 2.4   | 75    |
| 21 | PVA and chitosan (CS)                | Ti <sub>3</sub> C <sub>2</sub> T <sub>x</sub> (MXene) and La <sub>0.5</sub> Sr <sub>0.5</sub> CoO <sub>3</sub> (LSC) | 2.73  | 92.3  |
| 22 | PVA                                  | Polydopamine (PDA)                                                                                                   | 2.94  | 94.5  |
| 23 | PVA                                  | Polypyrrole (PPy), micro-tree array                                                                                  | 3.64  | 96    |
| 24 | Nanofibrous PVA based membrane (NPM) | Polypyrrole (PPy) and graphene oxide (GO)                                                                            | 2.87  | 87.5  |
| 25 | PVA and chitosan (CS)                | Red Mud                                                                                                              | 2.185 | 90.74 |
| 26 | PVA                                  | Nanocarbon                                                                                                           | 1.67  | 86.8  |
| 27 | PVA                                  | Conjugated small molecule (DPP-2T)                                                                                   | 2.6   | 89    |

---

90

91



### 3. Supporting references

- 93 1. Y. Guo, F. Zhao, X. Zhou, Z. Chen and G. Yu, *Nano Lett*, 2019, **19**, 2530-2536.
- 94 2. Y. Lu, D. Fan, Y. Wang, H. Xu, C. Lu and X. Yang, *ACS Nano*, 2021, **15**, 10366-  
95 10376.
- 96 3. Y. Guo, H. Lu, F. Zhao, X. Zhou, W. Shi and G. Yu, *Adv Mater*, 2020, **32**, e1907061.
- 97 4. Y. Guo, X. Zhao, F. Zhao, Z. Jiao, X. Zhou and G. Yu, *Energy & Environmental  
98 Science*, 2020, **13**, 2087-2095.
- 99 5. M. Tan, J. Wang, W. Song, J. Fang and X. Zhang, *Journal of Materials Chemistry A*,  
100 2019, **7**, 1244-1251.
- 101 6. L. Zhao, J. Tian, Y. Liu, L. Xu, Y. Wang, X. Fei and Y. Li, *Environmental Science:  
102 Water Research & Technology*, 2020, **6**, 221-230.
- 103 7. H. Jian, Q. Qi, W. Wang and D. Yu, *Separation and Purification Technology*, 2021,  
104 **264**, 118459.
- 105 8. B. Wen, X. Zhang, Y. Yan, Y. Huang, S. Lin, Y. Zhu, Z. Wang, B. Zhou, S. Yang and  
106 J. Liu, *Desalination*, 2021, **516**, 115228.
- 107 9. X. Liang, X. Zhang, Q. Huang, H. Zhang, C. Liu and Y. Liu, *Solar Energy*, 2020, **208**,  
108 778-786.
- 109 10. Z. Yu and P. Wu, *Advanced Materials Technologies*, 2020, **5**, 2000065.
- 110 11. F. Zhao, X. Zhou, Y. Shi, X. Qian, M. Alexander, X. Zhao, S. Mendez, R. Yang, L.  
111 Qu and G. Yu, *Nat Nanotechnol*, 2018, **13**, 489-495.
- 112 12. X. Zhou, F. Zhao, Y. Guo, Y. Zhang and G. Yu, *Energy & Environmental Science*,  
113 2018, **11**, 1985-1992.
- 114 13. X. Zhou, F. Zhao, Y. Guo, B. Rosenberger and G. Yu, *Science Advances*, 2019, **5**,  
115 eaaw5484.
- 116 14. X. Zhou, Y. Guo, F. Zhao, W. Shi and G. Yu, *Advanced Materials*, 2020, **32**,  
117 2007012.
- 118 15. H. Wang, R. Zhang, D. Yuan, S. Xu and L. Wang, *Advanced Functional Materials*,  
119 2020, **30**, 2003995.
- 120 16. Y. Guo, X. Zhou, F. Zhao, J. Bae, B. Rosenberger and G. Yu, *ACS Nano*, 2019, **13**,  
121 7913-7919.
- 122 17. F. Yu, X. Ming, Y. Xu, Z. Chen, D. Meng, H. Cheng, Z. Shi, P. Shen and X. Wang,  
123 *Advanced Materials Interfaces*, 2019, **6**, 1901168.
- 124 18. J. Tian, X. Huang and W. Wu, *Industrial & Engineering Chemistry Research*, 2020,  
125 **59**, 1135-1141.
- 126 19. W. Lei, S. Khan, L. Chen, N. Suzuki, C. Terashima, K. Liu, A. Fujishima and M. Liu,  
127 *Nano Research*, 2021, **14**, 1135-1140.
- 128 20. H. Lu, W. Shi, F. Zhao, W. Zhang, P. Zhang, C. Zhao and G. Yu, *Advanced  
129 Functional Materials*, 2021, **31**, 2101036.
- 130 21. D. Fan, Y. Lu, H. Zhang, H. Xu, C. Lu, Y. Tang and X. Yang, *Applied Catalysis B:  
131 Environmental*, 2021, **295**, 120285.
- 132 22. Z. Huang, J. Wei, Y. Wan, P. Li, J. Yu, J. Dong, S. Wang, S. Li and C.-S. Lee, *Small*,  
133 2021, **17**, 2101487.
- 134 23. Y. Shi, O. Ilic, H. A. Atwater and J. R. Greer, *Nature Communications*, 2021, **12**,  
135 2797.
- 136 24. S. Chen, Y. Liu, Y. Wang, K. Xu, X. Zhang, W. Zhong, G. Luo and M. Xing,  
137 *Chemical Engineering Journal*, 2021, **411**, 128042.
- 138 25. P. Wang, X. Wang, S. Chen, J. Zhang, X. Mu, Y. Chen, Z. Sun, A. Wei, Y. Tian, J.  
139 Zhou, X. Liang, L. Miao and N. Saito, *ACS Applied Materials & Interfaces*, 2021, **13**,  
140 30556-30564.

- 141 26. Y. Li, W. Hong, H. Li, Z. Yan, S. Wang, X. Liu, B. Li, H. Jiang and X. Niu,  
142 *Desalination*, 2021, **511**, 115113.
- 143 27. Q. Zhao, Z. Huang, Y. Wan, J. Tan, C. Cao, S. Li and C.-S. Lee, *Journal of Materials*  
144 *Chemistry A*, 2021, **9**, 2104-2110.
